# Supplementary material for: Molecular dynamics study on the interaction between doxorubicin and hydrophobically modified chitosan oligosaccharide
Source: Royal Society of Chemistry journal article supplement (doi:10.1039/c4ra01199f), 2014-01-01
Supplement: c4ra01199f1.pdf [file c4ra01199f1.pdf]

## SUPPLEMENTARY INFORMATION

### Molecular dynamics study on the interaction between doxorubicin and hydrophobically modified chitosan oligosaccharide

Peng Shan,<sup>a,b,‡</sup> Jia-Wei Shen,<sup>a,‡</sup> Dong-Hang Xu,<sup>c</sup> Li-Yun Shi,<sup>a</sup> Jie Gao,<sup>d</sup> Ya-Wei Lan,<sup>d</sup>  
Qi Wang,<sup>d,\*</sup> and Xiao-Hong Wei<sup>a,\*,§</sup>

<sup>a</sup> School of Medicine, Hangzhou Normal University, Hangzhou 310036, PR China

<sup>b</sup> College of Material, Chemistry and Chemical Engineering, Hangzhou Normal University,  
Hangzhou 310036, PR China

<sup>c</sup> Second Affiliated Hospital, College of Medicine, Zhejiang University, Hangzhou 310009, PR  
China

<sup>d</sup> Soft Matter Research Center and Department of Chemistry, Zhejiang University, Hangzhou  
310027, PR China

<sup>‡</sup> Peng Shan and Jia-Wei Shen contributed equally to this work.

\* Corresponding author. E-mail addresses: [qiwang@zju.edu.cn](mailto:qiwang@zju.edu.cn), [xiaohongwei1@foxmail.com](mailto:xiaohongwei1@foxmail.com).

<sup>§</sup> Corresponding author. Fax: +86-571-28869344.

#### Methods:

The synthesis of COS/IMN: COS/IMN was synthesized by a conjugation reaction between amino-groups of COS and carboxyl groups of IMN using 1-ethyl-3-(3-dimethylaminopropyl) carbodiimide hydrochloride (EDC) as a coupling agent. In brief, 0.1 g (0.00556 mmol) COS (Mw = 18000) was dissolved in 6 mL doubled distilled water. Meanwhile, 0.0444 g (0.1242 mmol) IMN and 0.1191 g (0.6210 mmol) EDC were dissolved in 6 mL ethanol. Under 25 °C water bath and fast stirring, the IMN/ethanol solution was slowly dropped into the COS aqueous solution. After 53 h, the mixture was transferred into a dialysis bag (MWCO = 7000) and dialyzed against

doubled distilled water for 24 h to remove the unreacted IMN and EDC. The final product was frozen and dried in a vacuum.

The preparation of DOX-loaded COS/IMN nanoparticles: DOX-loaded COS/IMN nanoparticles (NPs) were prepared by a dialysis method as follows. 1 mg of DOX powder was weighed and dissolved into 1 mL DMSO (1 mg/mL). Meanwhile, 10 mg freeze dried COS/IMN powder was weighed and dissolved in 5 mL double distilled water. 1 mL DOX/DMSO (1 mg/mL) was dropped into the COS/IMN water solution according to the fixed feed ratio of drug to polymer (10%, w/w). The available mixture was dispersed by probe-type ultrasonic treatment 40 times (400 w, work 2 s, rest 4) in an ice-bath. The treated solution stirred overnight. Then the solution was transferred into a dialysis bag (MWCO = 7000) and dialyzed against doubled distilled water for 4 h to remove DMSO. The dialyzate was poured out of the dialysis bag and centrifuged at 4000 rpm for 15 min to remove the precipitated particles. The obtained solution of DOX-loaded NPs was frozen and dried to get the lyophilized product.

The characterization of the DOX-loaded nanoparticles: The micelle sizes of the DOX-loaded NPs were measured by dynamic light scattering using a Zetasizer (Malvern zetasizer nano zs90, UK). The encapsulation efficiency (EE) and drug loading rate (DL) were determined by fluorescence spectrophotometer (EX = 468 nm, EM = 566 nm, slit 5 nm, voltage 700 mV). The standard curve equation of DOX:  $y = 160464x + 880.15$ ,  $R^2 = 0.9944$ .

## Results:

The micelle size, encapsulation efficiency (*EE*) and drug loading (*DL*) rate of DOX-loaded NPs were show in Table S1.

Table S1. The micelle size, encapsulation efficiency and drug loading rate of DOX-loaded NPs.

| COS <sub>Mw</sub> /IMN <sub>theory SD%</sub> <sup>a</sup> | Size <sup>b</sup> (nm) | EE <sup>c</sup> (%) | DL <sup>d</sup> (%) |
|-----------------------------------------------------------|------------------------|---------------------|---------------------|
| COS <sub>18000</sub> /IMN <sub>20%</sub>                  | 345.1                  | 81.58±0.86          | 7.76±0.4            |

<sup>a</sup>Mw represents the molecular weight of COS and the theory SD% represents the theory substitution degree of IMN to COS.

<sup>b</sup>Size measured by dynamic light scattering using a Zetasizer (Malvern zetasizer nano zs90, UK).

<sup>c</sup>Drug encapsulation efficiency of DOX(10%)-loaded COS/IMN NPs measured by Fluorescence.

<sup>d</sup>Drug loading capacity of DOX(10%)-loaded COS/IMN NPs measured by Fluorescence spectrophotometer.

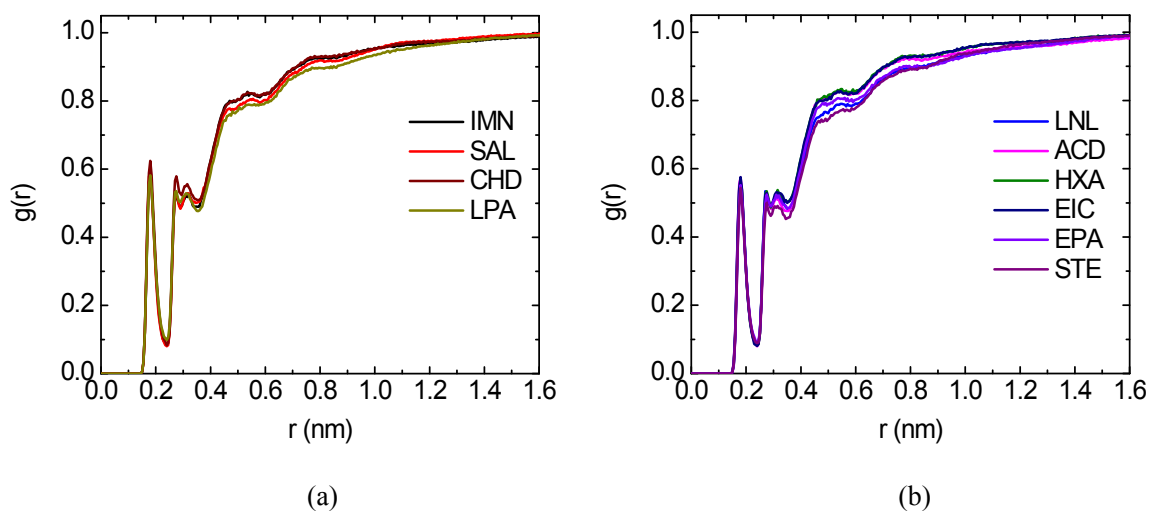

**Fig. S1** (a) Radial distribution functions for oxygen (in COS/IMN chain)-oxygen (in water) (black), oxygen (in COS/SAL chain)-oxygen (in water) (red), oxygen (in COS/CHD chain)-oxygen (in water) (wine) and oxygen (in COS/LPA chain)-oxygen (in water) (dark yellow); (b) Radial distribution functions for oxygen (in COS/LNL chain)-oxygen (in water) (blue), oxygen (in COS/ACD chain)-oxygen (in water) (magenta), oxygen (in COS/HXA chain)-oxygen (in water) (olive), oxygen (in COS/EIC chain)-oxygen (in water) (navy), oxygen (in COS/EPA chain)-oxygen (in water) (violet) and oxygen (in COS/STE chain)-oxygen (in water) (purple).

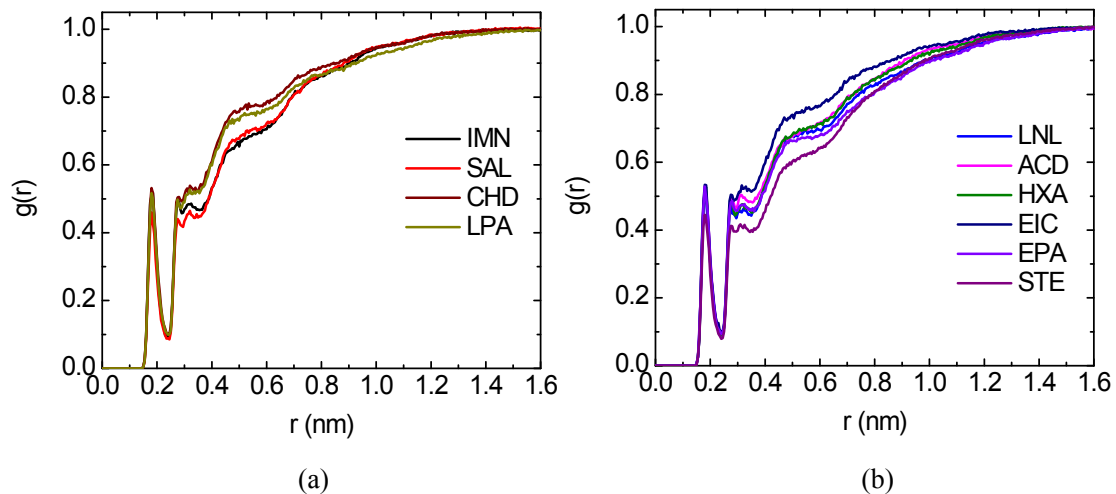

**Fig. S2** (a) Radial distribution functions of oxygen (in DOX)-oxygen (in water) in the system of COS/IMN (black), COS/SAL (red), COS/CHD (wine) and COS/LPA (dark yellow); (b) Radial distribution functions of oxygen (in DOX)-oxygen (in water) in the system of COS/LNL (blue), COS/ACD (magenta), COS/HXA (olive), COS/EIC (navy), COS/EPA (violet) and COS/STE (purple).
